# Supplementary material for: Risk of post-pregnancy hypertension in women with a history of hypertensive disorders of pregnancy: nationwide cohort study
Source: PubMed Central journal article supplement — BMJ. 2017 Jul 12;358:j3078. doi: 10.1136/bmj.j3078 (PMC5506851; doi:10.1136/bmj.j3078), 2017-07-12

## ONLINE SUPPLEMENTARY MATERIAL

Table 1. 10-year cumulative incidences of hypertension after a 1) first delivery and 2) second delivery, by age at delivery, in women with and without a history of hypertensive disorders of pregnancy, Denmark, 1995-2012.

Table 2. Hazard ratios for hypertension by time since most recent pregnancy and hypertensive disorder of pregnancy severity, among women with at least one live birth or stillbirth in Denmark, 1978-2012.

Table 3. Hazard ratios for hypertension by time since most recent pregnancy and hypertensive disorder of pregnancy severity, among women with at least one live birth or stillbirth in Denmark, 1978-2012, with and without additional adjustment for diabetes.

Table 4. Hazard ratios for hypertension by time since most recent pregnancy and hypertensive disorder of pregnancy severity, among women with at least one live birth or stillbirth in Denmark 1991-2012, with and without additional adjustment for smoking.

Table 5. Hazard ratios for hypertension by time since most recent pregnancy and hypertensive disorder of pregnancy severity, among women with at least one live birth or stillbirth in Denmark 2004-2012, with and without additional adjustment for body mass index.

Table 6. Hazard ratios for hypertension by time since most recent pregnancy and timing of delivery in pregnancies complicated by hypertensive disorders of pregnancy, among women with at least one live birth or stillbirth in Denmark, 1978-2012.

Table 7. Hazard ratios hypertension by history of most severe hypertensive disorder of pregnancy and attained age, among women with at least one live birth or stillbirth in Denmark, 1978-2012.

Table 8. Hazard ratios for hypertension by hypertensive disorder of pregnancy sequence in the two first pregnancies according to years since second pregnancy, among women with at least two live births or stillbirths in Denmark, 1978-2012.

Table 9 Hazard ratios for hypertension >1 year post-partum by history of most severe hypertensive disorder of pregnancy and attained age, among women with at least one live birth or stillbirth in Denmark, 1978-2012.

Table 10. Hazard ratios for hypertension >1 year post-partum by hypertensive disorder of pregnancy sequence in the two first pregnancies according to years since second pregnancy, among women with at least two live births or stillbirths in Denmark, 1978-2012.

Figure 1. Hazard ratios for hypertension by hypertensive disorder of pregnancy (if any) in the most recent pregnancy and time since most recent pregnancy, among women with at least one live birth or stillbirth in Denmark, 1978-2012. Hypertensive disorders of pregnancy are classified by timing of delivery, such that hazard ratios compare rates of hypertension among women with hypertensive disorders of pregnancy and delivery <34 gestational weeks (orange), hypertensive disorders of

pregnancy and delivery at 34-36 weeks (green), and hypertensive disorders of pregnancy and delivery  $\geq 37$  gestational weeks (black) in the latest pregnancy, with rates of hypertension in women whose most recent pregnancy was normotensive. Follow-up began in 1995 or 3 months postpartum, whichever came later. Hazard ratios are adjusted for maternal age, maternal birth year and parity.

**Table 1. 10-year cumulative incidences of hypertension after a 1) first delivery and 2) second delivery, by age at delivery, in women with and without a history of hypertensive disorders of pregnancy, Denmark, 1995-2012.**

| Cumulative incidence from: | History of HDP* | Age at delivery (years) | 10-year cumulative incidence of hypertension (95% confidence interval) |                                           |
|----------------------------|-----------------|-------------------------|------------------------------------------------------------------------|-------------------------------------------|
|                            |                 |                         | Follow-up began 3 months after delivery                                | Follow-up began 12 months after delivery† |
| First delivery             | Yes             | 20-29                   | 13.7 (13.0, 14.4)                                                      | 12.5 (11.8, 13.2)                         |
|                            |                 | 30-39                   | 20.3 (19.1, 21.4)                                                      | 18.3 (17.1, 19.4)                         |
|                            |                 | 40-49                   | 32.4 (26.4, 38.6)                                                      | 29.6 (23.5, 36.0)                         |
|                            | No              | 20-29                   | 4.0 (3.9, 4.0)                                                         | 3.8 (3.7, 3.9)                            |
|                            |                 | 30-39                   | 5.7 (5.5, 5.8)                                                         | 5.5 (5.4, 5.7)                            |
|                            |                 | 40-49                   | 11.3 (10.2, 12.4)                                                      | 11.0 (9.9, 12.1)                          |
| Second delivery            | Yes             | 20-29                   | 16.3 (15.4, 17.1)                                                      | 15.7 (14.8, 16.5)                         |
|                            |                 | 30-39                   | 21.7 (20.8, 22.6)                                                      | 20.4 (19.5, 21.3)                         |
|                            |                 | 40-49                   | 38.0 (32.2, 43.8)                                                      | 35.9 (29.9, 41.9)                         |
|                            | No              | 20-29                   | 5.3 (5.1, 5.4)                                                         | 5.2 (5.0, 5.3)                            |
|                            |                 | 30-39                   | 6.7 (6.6, 6.9)                                                         | 6.6 (6.5, 6.9)                            |
|                            |                 | 40-49                   | 11.4 (10.4, 12.4)                                                      | 11.4 (10.4, 12.4)                         |

HDP, hypertensive disorders of pregnancy.

\* Hypertensive disorder of pregnancy in a woman's first pregnancy, for cumulative incidences calculated from the first delivery, and in either the first or second pregnancy, for cumulative incidences calculated from the second delivery.

† Women who developed hypertension in 3-12 months post-partum were excluded from these analyses.

**Table 2. Hazard ratios\* for hypertension by time since most recent pregnancy and hypertensive disorder of pregnancy severity, among women with at least one live birth or stillbirth in Denmark, 1978-2012.**

| Years since most recent pregnancy | Hypertensive disorder of pregnancy status in the most recent pregnancy |            |                                |            |                       |                                |            |                       |                                |            |                       |
|-----------------------------------|------------------------------------------------------------------------|------------|--------------------------------|------------|-----------------------|--------------------------------|------------|-----------------------|--------------------------------|------------|-----------------------|
|                                   | Normotensive pregnancy (reference group)                               |            | Severe preeclampsia            |            |                       | Moderate preeclampsia          |            |                       | Gestational hypertension       |            |                       |
|                                   | Person-years x 10 <sup>3</sup>                                         | No. events | Person-years x 10 <sup>3</sup> | No. events | Hazard ratio (95% CI) | Person-years x 10 <sup>3</sup> | No. events | Hazard ratio (95% CI) | Person-years x 10 <sup>3</sup> | No. events | Hazard ratio (95% CI) |
| <1                                | 768                                                                    | 2326       | 5.2                            | 327        | 24.5 (21.8, 27.6)     | 14.5                           | 442        | 11.6 (10.4, 12.8)     | 6.2                            | 426        | 23.7 (21.4, 26.4)     |
| 1                                 | 962                                                                    | 3278       | 6.3                            | 115        | 6.45 (5.35, 7.78)     | 18.0                           | 280        | 5.25 (4.64, 5.94)     | 7.2                            | 220        | 9.65 (8.41, 11.1)     |
| 2                                 | 806                                                                    | 3880       | 5.0                            | 92         | 4.61 (3.75, 5.68)     | 14.3                           | 262        | 4.35 (3.83, 4.93)     | 5.4                            | 178        | 7.16 (6.15, 8.32)     |
| 3                                 | 680                                                                    | 4219       | 3.8                            | 89         | 4.22 (3.42, 5.21)     | 11.4                           | 230        | 3.61 (3.16, 4.12)     | 4.2                            | 163        | 6.25 (5.34, 7.31)     |
| 4                                 | 603                                                                    | 4406       | 3.2                            | 82         | 3.81 (3.06, 4.75)     | 9.7                            | 249        | 3.75 (3.30, 4.27)     | 3.5                            | 158        | 6.17 (5.26, 7.24)     |
| 5                                 | 554                                                                    | 4782       | 2.8                            | 72         | 3.20 (2.53, 4.04)     | 8.7                            | 269        | 3.75 (3.32, 4.25)     | 3.0                            | 130        | 4.93 (4.14, 5.87)     |
| 6                                 | 520                                                                    | 4886       | 2.5                            | 66         | 2.93 (2.29, 3.74)     | 8.1                            | 253        | 3.44 (3.03, 3.91)     | 2.7                            | 136        | 5.18 (4.37, 6.15)     |
| 7                                 | 494                                                                    | 5172       | 2.3                            | 74         | 3.17 (2.52, 3.99)     | 7.7                            | 263        | 3.32 (2.93, 3.76)     | 2.5                            | 136        | 5.00 (4.21, 5.94)     |
| 8                                 | 471                                                                    | 5294       | 2.1                            | 70         | 2.98 (2.35, 3.78)     | 7.3                            | 258        | 3.20 (2.82, 3.63)     | 2.3                            | 112        | 4.12 (3.41, 4.97)     |
| 9                                 | 453                                                                    | 5457       | 2.0                            | 69         | 2.90 (2.29, 3.69)     | 7.0                            | 274        | 3.32 (2.94, 3.76)     | 2.2                            | 109        | 4.12 (3.40, 4.98)     |
| 10-14                             | 2050                                                                   | 32 409     | 8.3                            | 349        | 2.73 (2.46, 3.04)     | 32.3                           | 1329       | 2.67 (2.52, 2.82)     | 9.9                            | 562        | 3.48 (3.20, 3.78)     |
| 15-19                             | 1701                                                                   | 37 683     | 5.3                            | 256        | 2.24 (1.98, 2.53)     | 27.7                           | 1346       | 2.26 (2.14, 2.39)     | 9.0                            | 545        | 2.71 (2.49, 2.95)     |
| ≥20                               | 1788                                                                   | 57 119     | 4.0                            | 214        | 1.71 (1.49, 1.95)     | 26.9                           | 1673       | 1.95 (1.86, 2.05)     | 8.7                            | 634        | 2.26 (2.09, 2.44)     |

CI, confidence interval.

\* Follow-up began in 1995 or 3 months postpartum, whichever came later. All hazard ratios adjusted for maternal age, maternal birth year and parity.

**Table 3. Hazard ratios\* for hypertension by time since most recent pregnancy and hypertensive disorder of pregnancy severity, among women with at least one live birth or stillbirth in Denmark, 1978-2012, with and without additional adjustment for diabetes.**

| Years since most recent pregnancy | Hypertensive disorder of pregnancy status in the most recent pregnancy |            |                                 |            |                           |                                    |                                 |            |                           |                                    |                                 |            |                           |                                    |
|-----------------------------------|------------------------------------------------------------------------|------------|---------------------------------|------------|---------------------------|------------------------------------|---------------------------------|------------|---------------------------|------------------------------------|---------------------------------|------------|---------------------------|------------------------------------|
|                                   | Normotensive pregnancy (reference group)                               |            | Severe preeclampsia             |            |                           |                                    | Moderate preeclampsia           |            |                           |                                    | Gestational hypertension        |            |                           |                                    |
|                                   | Person -years x 10 <sup>3</sup>                                        | No. events | Person -years x 10 <sup>3</sup> | No. events | Hazard ratio (95% CI)     |                                    | Person -years x 10 <sup>3</sup> | No. events | Hazard ratio (95% CI)     |                                    | Person -years x 10 <sup>3</sup> | No. events | Hazard ratio (95% CI)     |                                    |
|                                   |                                                                        |            |                                 |            | Not adjusted for diabetes | Additionally adjusted for diabetes |                                 |            | Not adjusted for diabetes | Additionally adjusted for diabetes |                                 |            | Not adjusted for diabetes | Additionally adjusted for diabetes |
| <1                                | 768                                                                    | 2326       | 5.2                             | 327        | 24.5 (21.8, 27.6)         | 23.3 (20.7, 26.3)                  | 14.5                            | 442        | 11.6 (10.4, 12.8)         | 11.1 (10.0, 12.3)                  | 6.2                             | 426        | 23.7 (21.4, 26.4)         | 23.5 (21.2, 26.2)                  |
| 1                                 | 962                                                                    | 3278       | 6.3                             | 115        | 6.45 (5.35, 7.78)         | 5.95 (4.92, 7.19)                  | 18.0                            | 280        | 5.25 (4.64, 5.94)         | 4.99 (4.40, 5.65)                  | 7.2                             | 220        | 9.65 (8.41, 11.1)         | 9.34 (8.13, 10.7)                  |
| 2                                 | 806                                                                    | 3880       | 5.0                             | 92         | 4.61 (3.75, 5.68)         | 4.41 (3.58, 5.44)                  | 14.3                            | 262        | 4.35 (3.83, 4.93)         | 4.20 (3.70, 4.77)                  | 5.4                             | 178        | 7.16 (6.15, 8.32)         | 6.99 (6.00, 8.14)                  |
| 3                                 | 680                                                                    | 4219       | 3.8                             | 89         | 4.22 (3.42, 5.21)         | 4.07 (3.29, 5.03)                  | 11.4                            | 230        | 3.61 (3.16, 4.12)         | 3.49 (3.05, 3.99)                  | 4.2                             | 163        | 6.25 (5.34, 7.31)         | 6.05 (5.16, 7.09)                  |
| 4                                 | 603                                                                    | 4406       | 3.2                             | 82         | 3.81 (3.06, 4.75)         | 3.75 (3.01, 4.68)                  | 9.7                             | 249        | 3.75 (3.30, 4.27)         | 3.66 (3.22, 4.17)                  | 3.5                             | 158        | 6.17 (5.26, 7.24)         | 6.03 (5.14, 7.09)                  |
| 5                                 | 554                                                                    | 4782       | 2.8                             | 72         | 3.20 (2.53, 4.04)         | 3.11 (2.46, 3.93)                  | 8.7                             | 269        | 3.75 (3.32, 4.25)         | 3.63 (3.21, 4.12)                  | 3.0                             | 130        | 4.93 (4.14, 5.87)         | 4.87 (4.08, 5.80)                  |
| 6                                 | 520                                                                    | 4886       | 2.5                             | 66         | 2.93 (2.29, 3.74)         | 2.86 (2.24, 3.66)                  | 8.1                             | 253        | 3.44 (3.03, 3.91)         | 3.30 (2.91, 3.76)                  | 2.7                             | 136        | 5.18 (4.37, 6.15)         | 5.03 (4.23, 5.99)                  |
| 7                                 | 494                                                                    | 5172       | 2.3                             | 74         | 3.17 (2.52, 3.99)         | 3.06 (2.43, 3.87)                  | 7.7                             | 263        | 3.32 (2.93, 3.76)         | 3.20 (2.82, 3.63)                  | 2.5                             | 136        | 5.00 (4.21, 5.94)         | 4.85 (4.08, 5.77)                  |
| 8                                 | 471                                                                    | 5294       | 2.1                             | 70         | 2.98 (2.35, 3.78)         | 2.82 (2.22, 3.58)                  | 7.3                             | 258        | 3.20 (2.82, 3.63)         | 3.11 (2.74, 3.53)                  | 2.3                             | 112        | 4.12 (3.41, 4.97)         | 4.04 (3.34, 4.89)                  |
| 9                                 | 453                                                                    | 5457       | 2.0                             | 69         | 2.90 (2.29, 3.69)         | 2.74 (2.16, 3.49)                  | 7.0                             | 274        | 3.32 (2.94, 3.76)         | 3.24 (2.87, 3.66)                  | 2.2                             | 109        | 4.12 (3.40, 4.98)         | 4.10 (3.38, 4.96)                  |
| 10-14                             | 2050                                                                   | 32 409     | 8.3                             | 349        | 2.73 (2.46, 3.04)         | 2.60 (2.34, 2.89)                  | 32.3                            | 1329       | 2.67 (2.52, 2.82)         | 2.57 (2.44, 2.72)                  | 9.9                             | 562        | 3.48 (3.20, 3.78)         | 3.43 (3.16, 3.73)                  |
| 15-19                             | 1701                                                                   | 37 683     | 5.3                             | 256        | 2.24 (1.98, 2.53)         | 2.13 (1.88, 2.40)                  | 27.7                            | 1346       | 2.26 (2.14, 2.39)         | 2.17 (2.06, 2.29)                  | 9.0                             | 545        | 2.71 (2.49, 2.95)         | 2.63 (2.42, 2.86)                  |
| ≥20                               | 1788                                                                   | 57 119     | 4.0                             | 214        | 1.71 (1.49, 1.95)         | 1.65 (1.45, 1.89)                  | 26.9                            | 1673       | 1.95 (1.86, 2.05)         | 1.88 (1.79, 1.98)                  | 8.7                             | 634        | 2.26 (2.09, 2.44)         | 2.21 (2.04, 2.39)                  |

CI, confidence interval.

\* Follow-up began in 1995 or 3 months postpartum, whichever came later. All hazard ratios adjusted for maternal age, maternal birth year and parity.

**Table 4. Hazard ratios\* for hypertension by time since most recent pregnancy and hypertensive disorder of pregnancy severity, among women with at least one live birth or stillbirth in Denmark 1991-2012, with and without additional adjustment for smoking.**

| Years since most recent pregnancy | Hypertensive disorder of pregnancy status in the most recent pregnancy |            |                                 |            |                          |                                   |                                 |            |                          |                                   |                                 |            |                          |                                   |
|-----------------------------------|------------------------------------------------------------------------|------------|---------------------------------|------------|--------------------------|-----------------------------------|---------------------------------|------------|--------------------------|-----------------------------------|---------------------------------|------------|--------------------------|-----------------------------------|
|                                   | Normotensive pregnancy (reference group)                               |            | Severe preeclampsia             |            |                          |                                   | Moderate preeclampsia           |            |                          |                                   | Gestational hypertension        |            |                          |                                   |
|                                   | Person -years x 10 <sup>3</sup>                                        | No. events | Person -years x 10 <sup>3</sup> | No. events | Hazard ratio (95% CI)    |                                   | Person -years x 10 <sup>3</sup> | No. events | Hazard ratio (95% CI)    |                                   | Person -years x 10 <sup>3</sup> | No. events | Hazard ratio (95% CI)    |                                   |
|                                   |                                                                        |            |                                 |            | Not adjusted for smoking | Additionally adjusted for smoking |                                 |            | Not adjusted for smoking | Additionally adjusted for smoking |                                 |            | Not adjusted for smoking | Additionally adjusted for smoking |
| <1                                | 744                                                                    | 2187       | 5.1                             | 303        | 23.1 (20.4, 26.1)        | 23.7 (21.0, 26.8)                 | 14.5                            | 415        | 10.9 (9.82, 12.1)        | 11.0 (9.87, 12.2)                 | 6.1                             | 408        | 23.3 (20.9, 25.9)        | 23.6 (21.2, 26.3)                 |
| 1                                 | 940                                                                    | 3175       | 6.2                             | 110        | 6.19 (5.12, 7.50)        | 6.29 (5.20, 7.62)                 | 18.2                            | 278        | 5.13 (4.54, 5.81)        | 5.16 (4.56, 5.84)                 | 7.2                             | 213        | 9.32 (8.11, 10.7)        | 9.45 (8.22, 10.9)                 |
| 2                                 | 787                                                                    | 3760       | 4.9                             | 92         | 4.58 (3.72, 5.63)        | 4.65 (3.77, 5.72)                 | 14.4                            | 266        | 4.31 (3.81, 4.89)        | 4.35 (3.84, 4.93)                 | 5.5                             | 180        | 7.16 (6.16, 8.32)        | 7.23 (6.22, 8.41)                 |
| 3                                 | 662                                                                    | 4087       | 3.8                             | 83         | 3.93 (3.16, 4.89)        | 4.03 (3.24, 5.01)                 | 11.5                            | 220        | 3.40 (2.97, 3.90)        | 3.44 (3.00, 3.94)                 | 4.2                             | 164        | 6.29 (5.38, 7.36)        | 6.29 (5.37, 7.37)                 |
| 4                                 | 570                                                                    | 4113       | 3.1                             | 79         | 3.84 (3.07, 4.80)        | 3.94 (3.15, 4.93)                 | 9.6                             | 244        | 3.75 (3.29, 4.27)        | 3.79 (3.33, 4.32)                 | 3.4                             | 147        | 5.94 (5.03, 7.00)        | 6.02 (5.10, 7.11)                 |
| 5                                 | 496                                                                    | 4247       | 2.6                             | 65         | 3.13 (2.45, 4.00)        | 3.21 (2.51, 4.11)                 | 8.2                             | 256        | 3.83 (3.37, 4.34)        | 3.86 (3.40, 4.38)                 | 2.8                             | 121        | 5.03 (4.19, 6.03)        | 5.10 (4.25, 6.11)                 |
| 6                                 | 440                                                                    | 4148       | 2.2                             | 55         | 2.70 (2.07, 3.53)        | 2.77 (2.12, 3.62)                 | 7.1                             | 221        | 3.39 (2.96, 3.88)        | 3.43 (3.00, 3.93)                 | 2.4                             | 113        | 5.02 (4.16, 6.05)        | 5.07 (4.20, 6.12)                 |
| 7                                 | 394                                                                    | 4143       | 2.0                             | 54         | 2.68 (2.05, 3.51)        | 2.73 (2.08, 3.57)                 | 6.3                             | 204        | 3.13 (2.72, 3.61)        | 3.14 (2.73, 3.62)                 | 2.0                             | 109        | 5.06 (4.18, 6.12)        | 5.13 (4.24, 6.22)                 |
| 8                                 | 353                                                                    | 4025       | 1.8                             | 61         | 3.10 (2.41, 4.00)        | 3.17 (2.46, 4.09)                 | 5.5                             | 213        | 3.40 (2.96, 3.90)        | 3.44 (3.00, 3.96)                 | 1.7                             | 76         | 3.79 (3.02, 4.76)        | 3.80 (3.02, 4.77)                 |
| 9                                 | 318                                                                    | 3902       | 5.2                             | 50         | 2.72 (2.06, 3.60)        | 2.76 (2.09, 3.65)                 | 4.9                             | 189        | 3.19 (2.76, 3.70)        | 3.21 (2.77, 3.71)                 | 1.5                             | 75         | 4.07 (3.24, 5.12)        | 4.14 (3.29, 5.22)                 |
| 10-14                             | 1129                                                                   | 18 433     | 5.2                             | 209        | 2.58 (2.25, 2.96)        | 2.65 (2.31, 3.03)                 | 16.8                            | 705        | 2.63 (2.44, 2.83)        | 2.66 (2.47, 2.87)                 | 4.7                             | 291        | 3.81 (3.40, 4.28)        | 3.90 (3.48, 4.38)                 |
| 15-19                             | 460                                                                    | 10 241     | 1.7                             | 83         | 2.25 (1.81, 2.80)        | 2.33 (1.88, 2.89)                 | 6.2                             | 284        | 2.15 (1.91, 2.42)        | 2.19 (1.94, 2.46)                 | 1.6                             | 92         | 2.51 (2.04, 3.08)        | 2.58 (2.10, 3.17)                 |
| ≥20                               | 33.1                                                                   | 778        | 0.12                            | 7          | 2.45 (1.16, 5.18)        | 2.46 (1.16, 5.22)                 | 0.40                            | 11         | 1.19 (0.65, 2.16)        | 1.22 (0.67, 2.21)                 | 0.12                            | 11         | 3.79 (2.08, 6.89)        | 3.95 (2.17, 7.21)                 |

CI, confidence interval.

\* Follow-up began in 1995 or 3 months postpartum, whichever came later. All hazard ratios adjusted for maternal age, maternal birth year and parity.

**Table 5. Hazard ratios\* for hypertension by time since most recent pregnancy and hypertensive disorder of pregnancy severity, among women with at least one live birth or stillbirth in Denmark 2004-2012, with and without additional adjustment for body mass index.**

| Years since most recent pregnancy | Hypertensive disorder of pregnancy status in the most recent pregnancy |            |                                 |            |                                  |                                           |                                 |            |                                  |                                           |                                 |            |                                  |                                           |
|-----------------------------------|------------------------------------------------------------------------|------------|---------------------------------|------------|----------------------------------|-------------------------------------------|---------------------------------|------------|----------------------------------|-------------------------------------------|---------------------------------|------------|----------------------------------|-------------------------------------------|
|                                   | Normotensive pregnancy (reference group)                               |            | Severe preeclampsia             |            |                                  |                                           | Moderate preeclampsia           |            |                                  |                                           | Gestational hypertension        |            |                                  |                                           |
|                                   | Person -years x 10 <sup>3</sup>                                        | No. events | Person -years x 10 <sup>3</sup> | No. events | Hazard ratio (95% CI)            |                                           | Person -years x 10 <sup>3</sup> | No. events | Hazard ratio (95% CI)            |                                           | Person -years x 10 <sup>3</sup> | No. events | Hazard ratio (95% CI)            |                                           |
|                                   |                                                                        |            |                                 |            | Not adjusted for body mass index | Additionally adjusted for body mass index |                                 |            | Not adjusted for body mass index | Additionally adjusted for body mass index |                                 |            | Not adjusted for body mass index | Additionally adjusted for body mass index |
| <1                                | 326                                                                    | 887        | 2.5                             | 126        | 21.7 (18.0, 26.3)                | 19.7 (16.2, 24.0)                         | 6.4                             | 157        | 10.4 (8.79, 12.4)                | 8.32 (6.98, 9.93)                         | 3.4                             | 190        | 21.7 (18.5, 25.5)                | 16.9 (14.3, 20.0)                         |
| 1                                 | 360                                                                    | 1225       | 2.6                             | 34         | 4.56 (3.24, 6.43)                | 4.20 (2.97, 5.93)                         | 6.7                             | 99         | 5.00 (4.06, 6.14)                | 4.13 (3.35, 5.10)                         | 3.4                             | 94         | 8.74 (7.08, 10.8)                | 7.07 (5.69, 8.78)                         |
| 2                                 | 258                                                                    | 1180       | 1.8                             | 37         | 5.45 (3.92, 7.58)                | 4.94 (3.54, 6.89)                         | 4.4                             | 78         | 4.41 (3.50, 5.56)                | 3.56 (2.82, 4.50)                         | 2.2                             | 70         | 7.43 (5.83, 9.48)                | 5.91 (4.61, 7.57)                         |
| 3                                 | 182                                                                    | 1128       | 1.1                             | 25         | 4.24 (2.85, 6.32)                | 3.97 (2.65, 5.94)                         | 2.8                             | 64         | 3.98 (3.09, 5.13)                | 3.21 (2.48, 4.17)                         | 1.4                             | 48         | 5.67 (4.24, 7.59)                | 4.08 (3.01, 5.53)                         |
| 4                                 | 131                                                                    | 908        | 0.74                            | 19         | 3.99 (2.52, 6.30)                | 3.37 (2.12, 5.35)                         | 1.9                             | 49         | 3.84 (2.87, 5.13)                | 3.02 (2.25, 4.07)                         | 0.94                            | 38         | 5.71 (4.12, 7.92)                | 4.31 (3.07, 6.03)                         |
| 5                                 | 93.6                                                                   | 778        | 0.48                            | 9          | 2.45 (1.27, 4.73)                | 2.06 (1.06, 4.01)                         | 1.3                             | 41         | 3.79 (2.76, 5.20)                | 3.02 (2.18, 4.18)                         | 0.59                            | 19         | 3.99 (2.53, 6.30)                | 3.14 (1.96, 5.01)                         |
| 6                                 | 62.9                                                                   | 592        | 0.29                            | 4          | 1.57 (0.59, 4.22)                | 1.46 (0.54, 3.96)                         | 0.90                            | 14         | 1.70 (0.99, 2.89)                | 1.34 (0.78, 2.30)                         | 0.36                            | 17         | 5.02 (3.09, 8.15)                | 3.94 (2.38, 6.51)                         |
| 7                                 | 36.1                                                                   | 339        | 0.18                            | 2          | 1.31 (0.33, 5.29)                | 1.15 (0.28, 4.76)                         | 0.52                            | 20         | 3.86 (2.44, 6.09)                | 2.92 (1.81, 4.71)                         | 0.21                            | 10         | 4.73 (2.49, 8.98)                | 3.44 (1.73, 6.83)                         |
| 8                                 | 11.6                                                                   | 125        | 0.06                            | 0          | -                                | -                                         | 0.16                            | 4          | 2.00 (0.73, 5.49)                | 1.45 (0.50, 4.22)                         | 0.07                            | 1          | -                                | -                                         |

CI, confidence interval.

\* Follow-up began in 2004 or 3 months postpartum, whichever came later. All hazard ratios adjusted for maternal age, maternal birth year and parity.

**Table 6. Hazard ratios\* for hypertension by time since most recent pregnancy and timing of delivery in pregnancies complicated by hypertensive disorders of pregnancy, among women with at least one live birth or stillbirth in Denmark, 1978-2012.**

| Years since most recent pregnancy | Normotensive pregnancy (reference group) |            | Timing of delivery in hypertensive disorders of pregnancy (most recent pregnancy) |            |                       |                                |            |                       |                                |            |                       |
|-----------------------------------|------------------------------------------|------------|-----------------------------------------------------------------------------------|------------|-----------------------|--------------------------------|------------|-----------------------|--------------------------------|------------|-----------------------|
|                                   |                                          |            | Early (delivery <34 weeks)                                                        |            |                       | Intermediate (34-36 weeks)     |            |                       | Late (≥ 37 weeks)              |            |                       |
|                                   | Person-years x 10 <sup>3</sup>           | No. events | Person-years x 10 <sup>3</sup>                                                    | No. events | Hazard ratio (95% CI) | Person-years x 10 <sup>3</sup> | No. events | Hazard ratio (95% CI) | Person-years x 10 <sup>3</sup> | No. events | Hazard ratio (95% CI) |
| <1                                | 769                                      | 2326       | 1.6                                                                               | 156        | 36.8 (31.2, 43.4)     | 2.8                            | 193        | 25.2 (21.7, 29.2)     | 21.4                           | 843        | 14.7 (13.6, 15.9)     |
| 1                                 | 962                                      | 3278       | 1.9                                                                               | 60         | 10.6 (8.20, 13.7)     | 3.5                            | 81         | 7.94 (6.36, 9.91)     | 26.0                           | 472        | 6.08 (5.51, 6.70)     |
| 2                                 | 806                                      | 3880       | 1.6                                                                               | 35         | 5.23 (3.75, 7.31)     | 2.9                            | 66         | 5.55 (4.35, 7.08)     | 20.1                           | 431        | 5.01 (4.53, 5.54)     |
| 3                                 | 680                                      | 4219       | 1.4                                                                               | 48         | 6.33 (4.75, 8.42)     | 2.3                            | 59         | 4.53 (3.50, 5.87)     | 15.6                           | 375        | 4.18 (3.76, 4.65)     |
| 4                                 | 603                                      | 4406       | 1.1                                                                               | 45         | 5.94 (4.42, 7.97)     | 2.0                            | 57         | 4.18 (3.22, 5.43)     | 13.2                           | 384        | 4.19 (3.77, 4.66)     |
| 5                                 | 554                                      | 4782       | 0.97                                                                              | 34         | 4.28 (3.05, 6.01)     | 1.8                            | 43         | 2.96 (2.19, 4.00)     | 11.7                           | 391        | 4.01 (3.62, 4.45)     |
| 6                                 | 520                                      | 4886       | 0.87                                                                              | 34         | 4.13 (2.95, 5.80)     | 1.6                            | 46         | 3.16 (2.36, 4.23)     | 10.8                           | 373        | 3.78 (3.40, 4.20)     |
| 7                                 | 494                                      | 5172       | 0.80                                                                              | 31         | 3.76 (2.64, 5.36)     | 1.5                            | 45         | 2.94 (2.19, 3.95)     | 10.2                           | 393        | 3.73 (3.36, 4.13)     |
| 8                                 | 471                                      | 5294       | 0.73                                                                              | 23         | 2.82 (1.87, 4.26)     | 1.4                            | 54         | 3.58 (2.74, 4.69)     | 9.6                            | 358        | 3.34 (3.00, 3.72)     |
| 9                                 | 453                                      | 5457       | 0.67                                                                              | 22         | 2.69 (1.77, 4.10)     | 1.3                            | 50         | 3.39 (2.56, 4.49)     | 9.2                            | 376        | 3.45 (3.11, 3.83)     |
| 10-14                             | 2050                                     | 32 409     | 2.6                                                                               | 124        | 2.98 (2.50, 3.56)     | 5.1                            | 208        | 2.64 (2.30, 3.02)     | 42.3                           | 1882       | 2.85 (2.72, 2.99)     |
| 15-19                             | 1701                                     | 37 683     | 1.6                                                                               | 67         | 1.89 (1.49, 2.40)     | 3.3                            | 166        | 2.31 (1.98, 2.69)     | 34.6                           | 1805       | 2.40 (2.29, 2.52)     |
| ≥20                               | 1788                                     | 57 119     | 1.1                                                                               | 65         | 1.86 (1.46, 2.37)     | 2.4                            | 146        | 1.95 (1.66, 2.29)     | 31.8                           | 2020       | 2.00 (1.91, 2.09)     |

CI, confidence interval.

\* Follow-up began in 1995 or 3 months postpartum, whichever came later. All hazard ratios adjusted for maternal age, maternal birth year and parity.



**Table 7. Hazard ratios\* hypertension by history of most severe hypertensive disorder of pregnancy and attained age, among women with at least one live birth or stillbirth in Denmark, 1978-2012.**

| Attained age (years) | Most severe hypertensive disorder of pregnancy in any pregnancy |            |                                |            |                       |                                |            |                       |                                |            |                       |
|----------------------|-----------------------------------------------------------------|------------|--------------------------------|------------|-----------------------|--------------------------------|------------|-----------------------|--------------------------------|------------|-----------------------|
|                      | Normotensive pregnancy (reference group)                        |            | Severe preeclampsia            |            |                       | Moderate preeclampsia          |            |                       | Gestational hypertension       |            |                       |
|                      | Person-years x 10 <sup>3</sup>                                  | No. events | Person-years x 10 <sup>3</sup> | No. events | Hazard ratio (95% CI) | Person-years x 10 <sup>3</sup> | No. events | Hazard ratio (95% CI) | Person-years x 10 <sup>3</sup> | No. events | Hazard ratio (95% CI) |
| <30                  | 1215                                                            | 3789       | 13.1                           | 222        | 5.40 (4.72, 6.19)     | 38.2                           | 463        | 3.80 (3.45, 4.18)     | 10.0                           | 175        | 5.78 (4.97, 6.73)     |
| 30-34                | 1953                                                            | 10 120     | 22.4                           | 516        | 4.49 (4.11, 4.91)     | 69.3                           | 1234       | 3.33 (3.14, 3.54)     | 19.7                           | 535        | 5.47 (5.01, 5.96)     |
| 35-39                | 2376                                                            | 20 366     | 26.0                           | 721        | 3.35 (3.11, 3.61)     | 88.4                           | 2160       | 2.82 (2.70, 2.95)     | 25.1                           | 892        | 4.34 (4.06, 4.64)     |
| 40-44                | 2278                                                            | 31 207     | 20.6                           | 727        | 2.71 (2.52, 2.92)     | 80.5                           | 2845       | 2.60 (2.50, 2.70)     | 22.3                           | 970        | 3.30 (3.10, 3.52)     |
| 45-49                | 1793                                                            | 37 313     | 12.1                           | 548        | 2.30 (2.11, 2.50)     | 55.4                           | 2676       | 2.34 (2.25, 2.43)     | 16.0                           | 870        | 2.68 (2.50, 2.86)     |
| ≥50                  | 1960                                                            | 60 993     | 7.9                            | 417        | 1.80 (1.63, 1.98)     | 46.4                           | 2610       | 1.86 (1.79, 1.94)     | 15.4                           | 1054       | 2.26 (2.13, 2.41)     |

CI, confidence interval.

\* Follow-up began in 1995 or 3 months postpartum, whichever came later. All hazard ratios adjusted for maternal age, maternal birth year, parity and time since most recent pregnancy.

**Table 8. Hazard ratios\* for hypertension by hypertensive disorder of pregnancy sequence in the two first pregnancies according to years since second pregnancy, among women with at least two live births or stillbirths in Denmark, 1978-2012.**

| Years since second pregnancy | Normotensive first and second pregnancies (reference group) |            | HDP in the first pregnancy followed by normotensive second pregnancy |            |                       | Normotensive first pregnancy followed by HDP in the second pregnancy |            |                       | HDP in both the first and second pregnancy |            |                       |
|------------------------------|-------------------------------------------------------------|------------|----------------------------------------------------------------------|------------|-----------------------|----------------------------------------------------------------------|------------|-----------------------|--------------------------------------------|------------|-----------------------|
|                              | Person-years x 10 <sup>3</sup>                              | No. events | Person-years x 10 <sup>3</sup>                                       | No. events | Hazard ratio (95% CI) | Person-years x 10 <sup>3</sup>                                       | No. events | Hazard ratio (95% CI) | Person-years x 10 <sup>3</sup>             | No. events | Hazard ratio (95% CI) |
| 0-4                          | 1545                                                        | 7166       | 57.0                                                                 | 660        | 2.52 (2.33, 2.73)     | 20.1                                                                 | 581        | 5.88 (5.40, 6.40)     | 11.4                                       | 418        | 7.76 (7.03, 8.57)     |
| 5-9                          | 1241                                                        | 11627      | 44.6                                                                 | 974        | 2.38 (2.23, 2.54)     | 16.2                                                                 | 564        | 3.57 (3.28, 3.88)     | 8.9                                        | 403        | 4.86 (4.40, 5.37)     |
| 10-14                        | 1059                                                        | 15 281     | 35.7                                                                 | 1130       | 2.25 (2.12, 2.39)     | 14.0                                                                 | 561        | 2.72 (2.50, 2.96)     | 6.9                                        | 386        | 3.92 (3.55, 4.34)     |
| 15-19                        | 748                                                         | 15 858     | 23.4                                                                 | 899        | 1.85 (1.73, 1.98)     | 9.5                                                                  | 472        | 2.34 (2.13, 2.56)     | 4.3                                        | 285        | 3.20 (2.85, 3.60)     |
| ≥20                          | 581                                                         | 17 150     | 16.2                                                                 | 784        | 1.65 (1.54, 1.78)     | 6.6                                                                  | 387        | 1.99 (1.80, 2.20)     | 2.6                                        | 199        | 2.59 (2.25, 2.97)     |

CI, confidence interval. HDP, hypertensive disorder of pregnancy.

\* Follow-up began in 1995 or 3 months after the second delivery, whichever came later. All hazard ratios adjusted for maternal age, maternal birth year and parity.

**Table 9 Hazard ratios\* for hypertension >1 year post-partum by history of most severe hypertensive disorder of pregnancy and attained age, among women with at least one live birth or stillbirth in Denmark, 1978-2012.**

| Attained age (years) | Most severe hypertensive disorder of pregnancy in any pregnancy |            |                                |            |                       |                                |            |                       |                                |            |                       |
|----------------------|-----------------------------------------------------------------|------------|--------------------------------|------------|-----------------------|--------------------------------|------------|-----------------------|--------------------------------|------------|-----------------------|
|                      | Normotensive pregnancy (reference group)                        |            | Severe preeclampsia            |            |                       | Moderate preeclampsia          |            |                       | Gestational hypertension       |            |                       |
|                      | Person-years x 10 <sup>3</sup>                                  | No. events | Person-years x 10 <sup>3</sup> | No. events | Hazard ratio (95% CI) | Person-years x 10 <sup>3</sup> | No. events | Hazard ratio (95% CI) | Person-years x 10 <sup>3</sup> | No. events | Hazard ratio (95% CI) |
| <30                  | 887                                                             | 3084       | 9.6                            | 118        | 3.52 (2.93, 4.24)     | 27.9                           | 321        | 3.22 (2.87, 3.62)     | 6.9                            | 93         | 3.99 (3.25, 4.91)     |
| 30-34                | 1674                                                            | 9323       | 18.9                           | 370        | 3.53 (3.19, 3.92)     | 60.0                           | 1034       | 3.01 (2.82, 3.21)     | 16.4                           | 392        | 4.46 (4.03, 4.93)     |
| 35-39                | 2253                                                            | 19 871     | 24.4                           | 610        | 2.93 (2.71, 3.18)     | 83.9                           | 1975       | 2.64 (2.53, 2.77)     | 23.3                           | 766        | 3.88 (3.61, 4.17)     |
| 40-44                | 2256                                                            | 31 064     | 20.2                           | 702        | 2.65 (2.45, 2.85)     | 79.6                           | 2793       | 2.57 (2.47, 2.67)     | 21.9                           | 923        | 3.17 (2.97, 3.39)     |
| 45-49                | 1792                                                            | 37 304     | 12.0                           | 546        | 2.29 (2.11, 2.50)     | 55.4                           | 2673       | 2.34 (2.25, 2.43)     | 16.0                           | 866        | 2.67 (2.49, 2.85)     |
| ≥50                  | 1960                                                            | 60 993     | 7.9                            | 417        | 1.80 (1.63, 1.98)     | 46.4                           | 2610       | 1.86 (1.79, 1.94)     | 15.4                           | 1054       | 2.26 (2.13, 2.41)     |

CI, confidence interval.

\* Follow-up began 1995 or 1 year post-partum, whichever came later. Women who developed hypertension between 3 and 12 months post-partum were excluded from the analyses. All hazard ratios adjusted for maternal age, maternal birth year, parity and time since most recent pregnancy.

**Table 10. Hazard ratios\* for hypertension >1 year post-partum by hypertensive disorder of pregnancy sequence in the two first pregnancies according to years since second pregnancy, among women with at least two live births or stillbirths in Denmark, 1978-2012.**

| Time since second pregnancy (years) | Normotensive first and second pregnancies (reference group) |            | HDP in the first pregnancy followed by normotensive second pregnancy |            |                       | Normotensive first pregnancy followed by HDP in the second pregnancy |            |                       | HDP in both the first and second pregnancy |            |                       |
|-------------------------------------|-------------------------------------------------------------|------------|----------------------------------------------------------------------|------------|-----------------------|----------------------------------------------------------------------|------------|-----------------------|--------------------------------------------|------------|-----------------------|
|                                     | Person-years x 10 <sup>3</sup>                              | No. events | Person-years x 10 <sup>3</sup>                                       | No. events | Hazard ratio (95% CI) | Person-years x 10 <sup>3</sup>                                       | No. events | Hazard ratio (95% CI) | Person-years x 10 <sup>3</sup>             | No. events | Hazard ratio (95% CI) |
| 1-4                                 | 1277                                                        | 6500       | 47.1                                                                 | 597        | 2.52 (2.32, 2.74)     | 16.5                                                                 | 414        | 4.66 (4.22, 5.15)     | 9.4                                        | 303        | 6.25 (5.57, 7.01)     |
| 5-9                                 | 1241                                                        | 11627      | 44.6                                                                 | 974        | 2.38 (2.23, 2.54)     | 16.2                                                                 | 564        | 3.57 (3.28, 3.88)     | 8.9                                        | 403        | 4.86 (4.40, 5.37)     |
| 10-14                               | 1059                                                        | 15 281     | 35.7                                                                 | 1130       | 2.25 (2.12, 2.39)     | 14.0                                                                 | 561        | 2.72 (2.50, 2.96)     | 6.9                                        | 386        | 3.92 (3.55, 4.34)     |
| 15-19                               | 748                                                         | 15 858     | 23.4                                                                 | 899        | 1.85 (1.73, 1.98)     | 9.5                                                                  | 472        | 2.34 (2.13, 2.56)     | 4.3                                        | 285        | 3.20 (2.85, 3.60)     |
| ≥20                                 | 581                                                         | 17 150     | 16.2                                                                 | 784        | 1.65 (1.54, 1.78)     | 6.6                                                                  | 387        | 1.99 (1.80, 2.20)     | 2.6                                        | 199        | 2.59 (2.25, 2.97)     |

CI, confidence interval. HDP, hypertensive disorder of pregnancy.

\* Follow-up began 1995 or 1 year post-partum, whichever came later. Women who developed hypertension between 3 and 12 months post-partum were excluded from the analyses. All hazard ratios adjusted for maternal age, maternal birth year and parity.

Supplementary Figure 1. Hazard ratios for hypertension by hypertensive disorder of pregnancy (if any) in the most recent pregnancy and time since most recent pregnancy, among women with at least one live birth or stillbirth in Denmark, 1978-2012. Hypertensive disorders of pregnancy are classified by timing of delivery, such that hazard ratios compare rates of hypertension among women with hypertensive disorders of pregnancy and delivery <34 gestational weeks (orange), hypertensive disorders of pregnancy and delivery at 34-36 weeks (green), and hypertensive disorders of pregnancy and delivery  $\geq 37$  gestational weeks (black) in the latest pregnancy, with rates of hypertension in women whose most recent pregnancy was normotensive. Follow-up began in 1995 or 3 months postpartum, whichever came later. Hazard ratios are adjusted for maternal age, maternal birth year and parity.

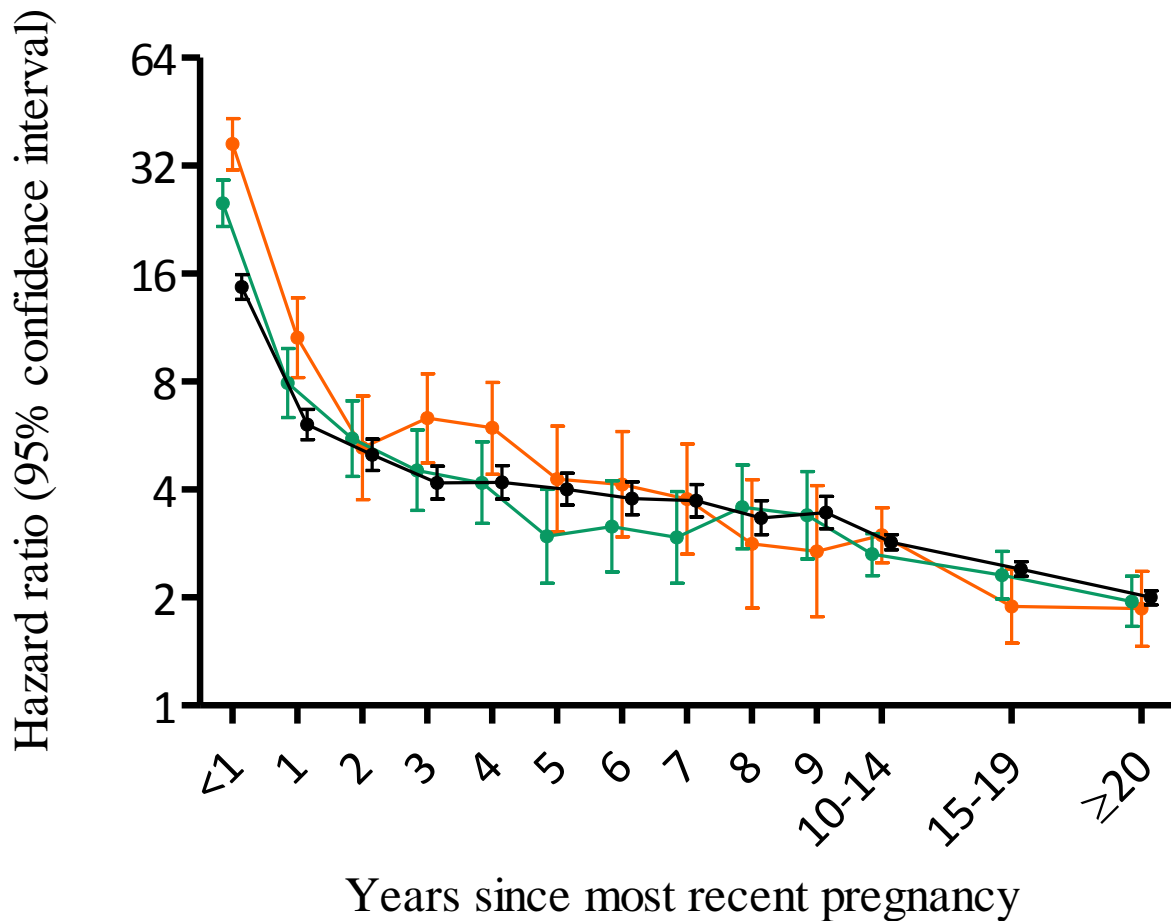

Supplement: behi038201.ww1.pdf [file behi038201.ww1.pdf]
